# Supplementary material
Source: PubMed Central journal article supplement (PMC3772391)
Supplement: supp_126.18.4239_JCS130195.pdf [file supp_126.18.4239_JCS130195.pdf]

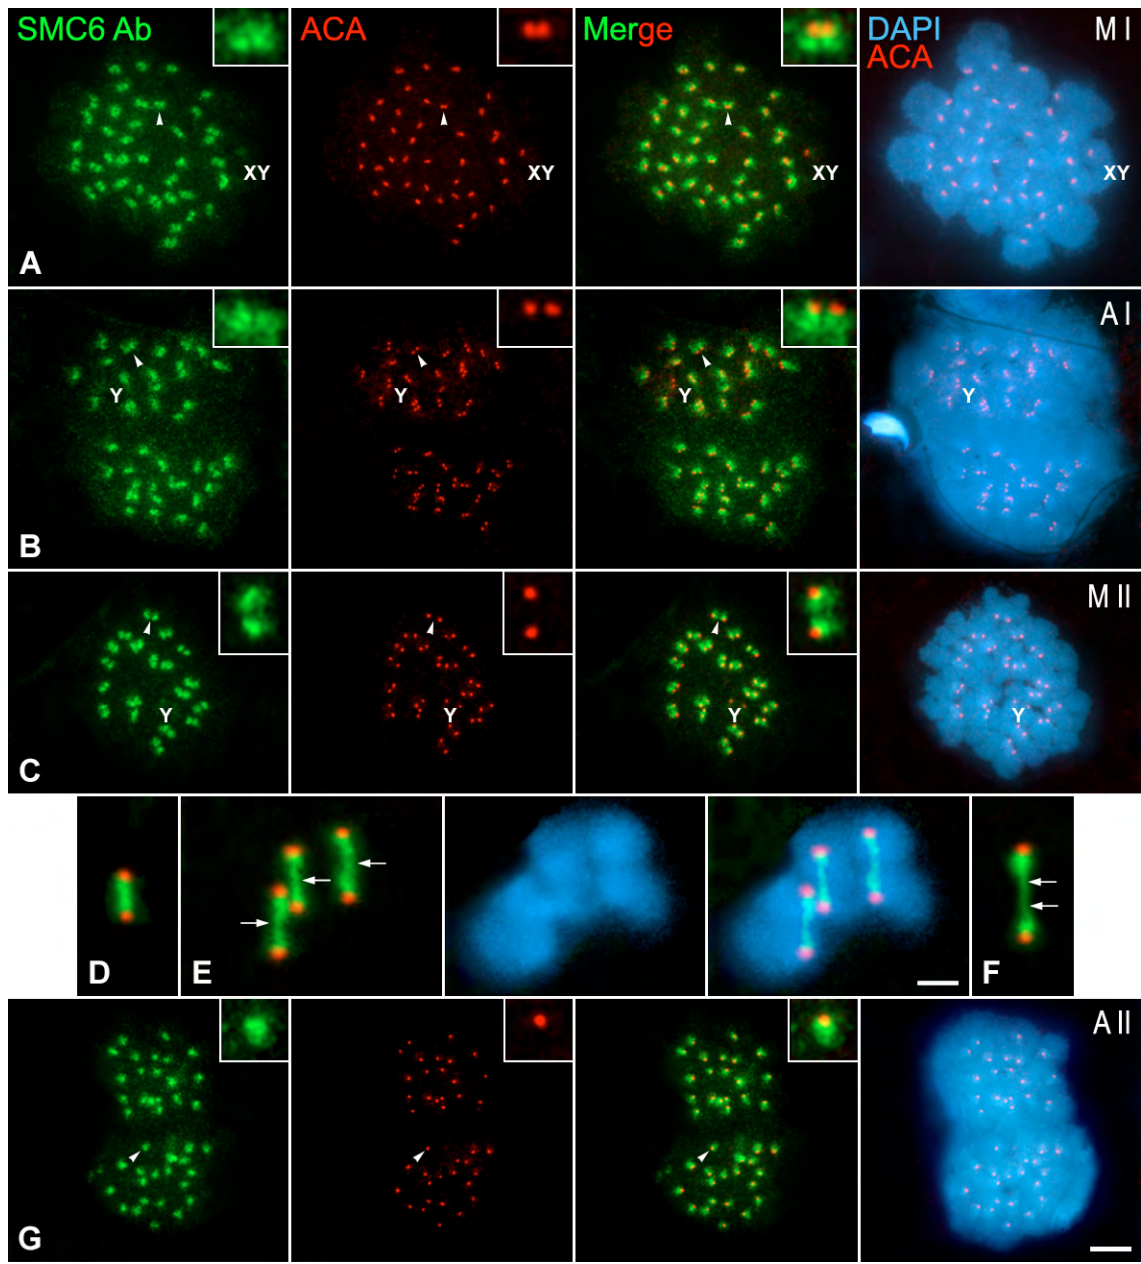

**Fig. S1. SMC6 Ab labeling at centromeres is underneath the kinetochores.** Double-immunolabeling of SMC6 Ab (green) and an ACA serum revealing kinetochores (red) and counterstaining of the chromatin with DAPI (blue) on spread metaphase I (A), anaphase I (B), metaphase II (C) and anaphase II (G) spermatocytes, and selected metaphase II (D,E) and early anaphase II (F) chromosomes from squashed spermatocytes. The sex bivalent (XY) and the Y chromosome (Y) are indicated. Arrowheads point to the centromeres that are enlarged in the insets. Arrows in (E,F) mark a strand between the Topo II $\alpha$  masses below each kinetochore. Scale bars: (A-C,G) 10  $\mu$ m; (D-F) 3  $\mu$ m.

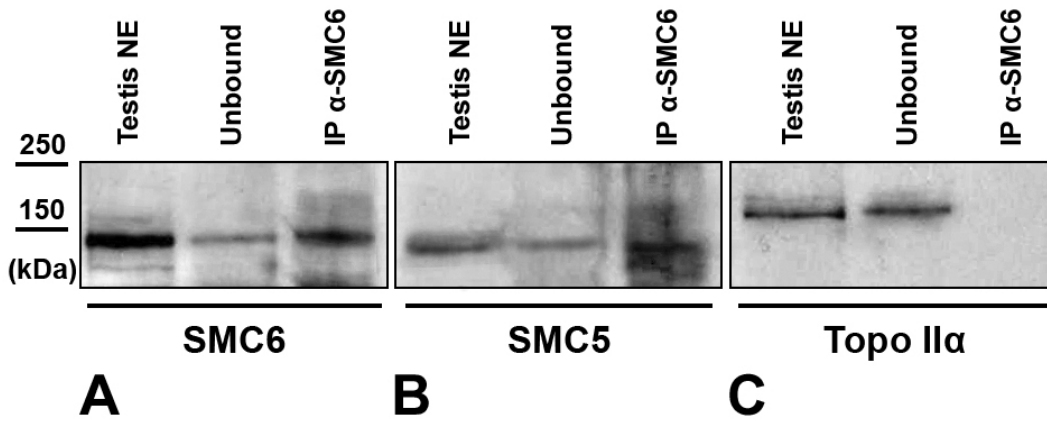

**Fig. S2. Immunoprecipitation assay for SMC6, SMC5 and Topo II $\alpha$ .** Western blotting using antibodies against SMC6 (A), SMC5 (B) and Topo II $\alpha$  (C) on testis nuclear extracts (NE), supernatant of non-immunoprecipitated proteins (Unbound), and SMC6 co-immunoprecipitated complexes (IP  $\alpha$ -SMC6). Bands of approximately 145 kDa are detected with anti-SMC6 and anti-SMC5 antibodies in NE, unbound and IP  $\alpha$ -SMC6 lanes. A band of approximately 170 kDa is detected with the anti-Topo II $\alpha$  antibody only in NE and unbound lanes. No band of anti-Topo II $\alpha$  is detected in IP  $\alpha$ -SMC6.

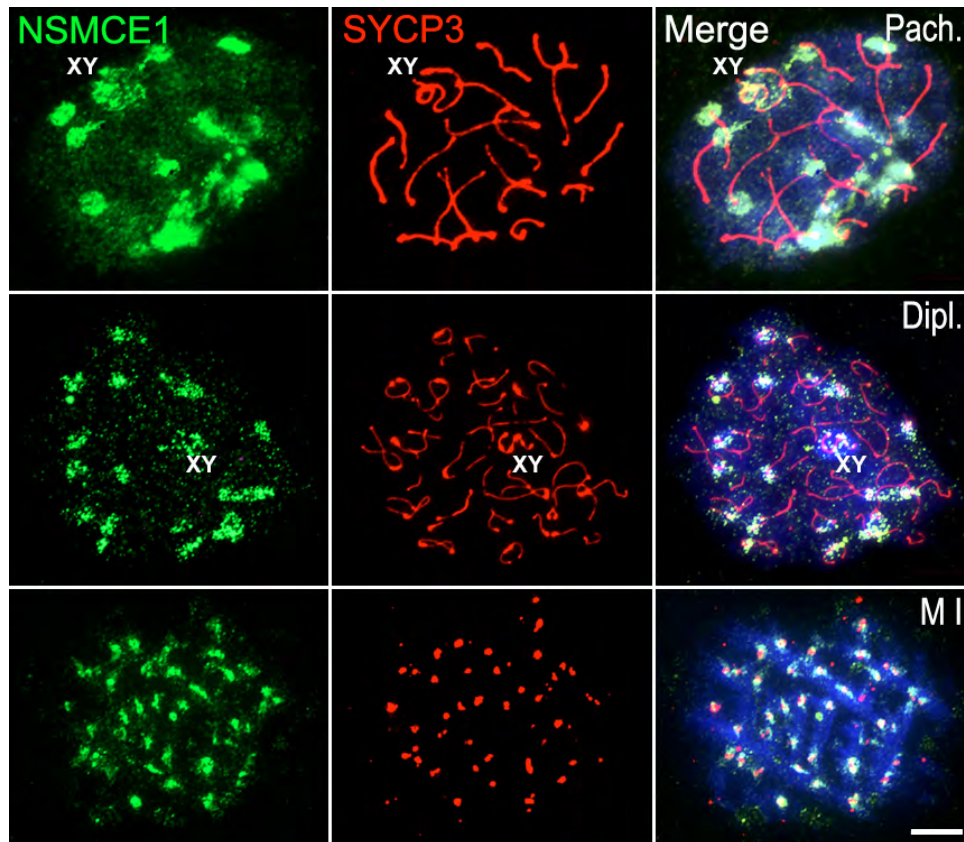

**Fig. S3. NSMCE1 localizes to chromocenters and the sex body in prophase I and at metaphase I centromeres.** Double-immunolabeling of NSMCE1 (green) and SYCP3 (red) and counterstaining of the chromatin with DAPI (blue) on spread pachytene (Pach.), diplotene (Dipl.) and metaphase I (M I) spermatocytes. Scale bar: 10  $\mu$ m.

## Supplementary Material

**Table S1. Primary and secondary antibodies used in this study.**

| PRIMARY ANTIBODIES             |            |                              |                          | DILUTION |                  |
|--------------------------------|------------|------------------------------|--------------------------|----------|------------------|
| Antibody                       | Host       | Source                       | Cat. number or reference | IF       | WB               |
| hSMC6 Le (6B1)                 | Rabbit     | Alan R. Lehmann              | Taylor et al., 2001      | 1:10     | 1:1,000          |
| hSMC6 Ab                       | Rabbit     | Abcam                        | ab-18039                 | 1:10     | 1:2,000-1:10,000 |
| hSMC6 Sc                       | Rabbit     | Santa Cruz                   | sc-134543                | 1:10     | --               |
| hSMC5 Le (5A1)                 | Rabbit     | Alan R. Lehmann              | Taylor et al., 2001      | 1:10     | --               |
| hSMC5 Ge                       | Rabbit     | GeneTex                      | GTX115669                | 1:100    | 1:1,000          |
| hSMC5                          | Rabbit     | Abcam                        | ab-18038                 | --       | 1:2,000          |
| hNSMCE1                        | Rabbit     | Abcam                        | ab-66956                 | 1:100    | 1:1,000          |
| hNSMCE4A                       | Rabbit     | Abgent                       | AP-9909a                 | --       | 1:250            |
| hNSMCE4B                       | Rabbit     | GeneTex                      | GTX119734                | --       | 1:1,000          |
| mSYCP3                         | Mouse      | Santa Cruz                   | sc-74569                 | 1:100    | --               |
| mSYCP3                         | Rat        | Mary A. Handel               | Eaker et al., 2001       | 1:500    | --               |
| mTEX12                         | Guinea-pig | Christer Höög                | Hamer et al., 2006       | 1:500    | --               |
| mSYCP1                         | Mouse      | José L. Barbero              | --                       | 1:10     | --               |
| SYCP1                          | Rabbit     | Novus Biologicals            | NB300-229                | --       | 1:10,000         |
| Kinetochores (ACA)             | Human      | Antibodies Incorporated      | 15-235                   | 1:50     | --               |
| hTopo II $\alpha$ (4E12)       | Mouse      | Akihiko Kikuchi              | Cobb et al., 1999        | 1:10     | 1:50             |
| Aurora-B                       | Mouse      | BD Transduction Laboratories | 611082                   | 1:20     | --               |
| $\gamma$ H2AX                  | Mouse      | Millipore                    | 05-636                   | 1:500    | --               |
| H3S10ph                        | Rabbit     | Millipore                    | 06-570                   | --       | 1:20,000         |
| $\alpha$ -Tubulin              | Rabbit     | Sigma                        | T9026                    | --       | 1:5,000          |
| SECONDARY ANTIBODIES           |            |                              |                          | DILUTION |                  |
| Antibody                       | Host       | Source                       | Cat. number or reference | IF       | WB               |
| Alexa 488 $\alpha$ -rabbit IgG | Donkey     | Molecular Probes             |                          | 1:500    | --               |
| Alexa 594 $\alpha$ -mouse IgG  | Donkey     | Molecular Probes             |                          | 1:500    | --               |
| Alexa 594                      | Donkey     | Molecular                    |                          | 1:500    | --               |

|                                           |        |                     |        |       |          |
|-------------------------------------------|--------|---------------------|--------|-------|----------|
| α-rat IgG                                 |        | Probes              |        |       |          |
| Alexa 594<br>α-human IgG                  | Donkey | Molecular<br>Probes |        | 1:500 | --       |
| Alexa 647<br>α-Guinea-pig<br>IgG          | Donkey | Molecular<br>Probes |        | 1:500 | --       |
| Horseradish<br>peroxidase<br>α-Rabbit IgG | Goat   | Invitrogen          | A10533 | --    | 1:20,000 |

## Supplementary Material

**Table S1. Primers used in this study.**

| Gene           | Forward primers (5'-.....-3')   | Reverse primers (5'-.....-3')  | Amplicon size (bp) |
|----------------|---------------------------------|--------------------------------|--------------------|
| <i>Smc5</i>    | <i>TGGCGACTCCGAGCGGGAAG</i>     | <i>GCCTGCGAGTCCGAGGCAAA</i>    | 296                |
| <i>Smc6</i>    | <i>CATGCGTGCTTTGTCCGGCG</i>     | <i>AGGTCGGAAGGGCAGTGTGGT</i>   | 295                |
| <i>Nsmce1</i>  | <i>CCGGCGTGATCTCGCTGGTTTG</i>   | <i>GCAGACGCCGAACCTCCCAC</i>    | 144                |
| <i>Nsmce2</i>  | <i>TGCCTTGGACCTTGTGGAGACT</i>   | <i>TCAGCTCCCTCAGCTGTTGCT</i>   | 278                |
| <i>Nsmce3</i>  | <i>TTCCAGGTTGGTTCGCGGGC</i>     | <i>GGATGCGGAGATGAGGGGCG</i>    | 283                |
| <i>Nsmce4a</i> | <i>GCGCTCTGACCTGAGCTCGT</i>     | <i>ATGCGAGGCTGTCTTGCCG</i>     | 270                |
| <i>Nsmce4b</i> | <i>AGCTGGTCCGGAGTCTGGCA</i>     | <i>GCCTGCGGATTTTGCGGCAC</i>    | 207                |
| <i>Syp1</i>    | <i>CATCAGCGAAGATTGCTTTG</i>     | <i>ATTGATGAGGAAAGCCGAGA</i>    | 253                |
| <i>Actb</i>    | <i>TAAAGACCTCTATGCCAACACAGT</i> | <i>CACGATGGAGGGGCGGACTCATC</i> | 241                |
